# Supplementary material for: Health Literacy and Its Association with Non-Communicable Disease Risk Factors Among Gurkha Veterans: Insights from Western Nepal
Source: Research Square preprint supplement (doi:10.21203/rs.3.rs-6809976/v1), 2025-08-20
Supplement: Supplementary file 1 [file 55c2a7e6309d98335ff8287e.docx]

***Table 3: Association between health literacy score and demographic & behavioral characteristics of Nepali Gurkha veterans***

| **Characteristics** | **1. Feeling understood**  **and supported by**  **healthcare**  **professionals**  Mean (SD) | **2. Having sufficient**  **information to**  **manage my health**  Mean (SD) | **3. Actively**  **managing my**  **health**  Mean (SD) | **4. Social**  **support for**  **health**  Mean (SD) | **5. Appraisal of**  **health**  **information**  Mean (SD) | **6. Ability to actively**  **engage with**  **healthcare**  **professionals**  Mean (SD) | **7. Navigating**  **the healthcare**  **system**  Mean (SD) | **8. Ability to**  **find good**  **health**  **information**  Mean (SD) | **9. Understand health**  **information enough**  **to know what to do**  Mean (SD) |
| --- | --- | --- | --- | --- | --- | --- | --- | --- | --- |
| **War Involvement**  Yes  No  Effect size:  95% CI | 2.33(0.58)  2.34(0.58)  -0.01  -0.33 to 0.30 | 2.29(0.54)  2.40(0.59)  -0.21  -0.52 to 0.11 | 2.39(0.62)  2.33(0.61)  0.10  -0.22 to 0.41 | 3.56(0.52)  3.59(0.52)  -0.05  -0.37 to 0.26 | 2.06(0.58)  2.01(0.58)  0.09  -0.23 to 0.40 | 2.16(0.79)  2.38(0.76)  -0.28  -0.60 to 0.40 | 1.85(0.76)  2.08(0.81)  -0.30  -0.62 to 0.01 | 2.15(0.78)  2.32(0.81)  -0.22  -0.53 to 0.10 | **2.26(0.63)**  **2.46(0.65)**  **-0.33**  **-0.64 to -0.01** |
| **Position**  Officer  Noncommissioned officer  Effect size  95% CI | 2.47(0.61)  2.29 (0.57)  0.31  -0.02 to 0.64 | 2.41(0.61)  2.29(0.53)  0.23  -0.11 to 0.56 | **2.55(0.68)**  **2.31(0.58)**  **0.38**  **0.05 to 0.71** | 3.63(0.49)  3.55(0.53)  0.16  -0.17 to 0.49 | **2.22(0.63)**  **1.99(0.55)**  **0.41**  **0.07 to 0.74** | 2.25(0.82)  2.21(0.78)  0.05  -0.28 to 0.38 | 1.93(0.81)  1.91(0.76)  0.02  -0.31 to 0.35 | 2.29(0.79)  2.17(0.79)  0.14  -0.19 to 0.47 | 2.33(0.64)  2.31(0.65)  0.03  -0.30 to 0.36 |
| **Current Tobacco Consumption**  Yes  No  Effect size  95% CI | 2.18(0.36)  2.36(0.60)  -0.31  -0.74 to 0.12 | **2.11(0.35)**  **2.34(0.57)**  **-0.43**  **-0.858 to -0.001** | 2.32(0.46)  2.38(0.64)  -0.09  -0.51 to 0.34 | 3.65(0.45)  3.55(0.53)  0.18  -0.24 to 0.61 | 1.83(0.33)  2.08(0.60)  -0.42  -0.85 to 0.01 | 1.96(0.56)  2.26(0.81)  -0.39  -0.82 to 0.05 | 1.63(0.48)  1.95(0.80)  -0.42  -0.85 to 0.01 | 2.02(0.69)  2.23(0.80)  -0.27  -0.70 to 0.16 | 2.20(0.53)  2.33(0.66)  -0.21  -0.63 to 0.22 |
| **Current Alcohol**  **Consumption**  Yes  No  Effect size  95% CI | 2.31(0.56)  2.44(0.67)  -0.22  -0.60 to 0.16 | 2.30(0.53)  2.42(0.63)  -0.23  -0.60 to 0.15 | 2.34(0.61)  2.53(0.64)  -0.32  -0.70 to 0.06 | 3.56(0.53)  3.61(0.47)  -0.09  -0.47 to 0.28 | 2.02(0.56)  2.19(0.65)  -0.30  -0.67 to 0.08 | 2.19(0.74)  2.41(0.97)  -0.28  -0.66 to 0.09 | 1.87(0.74)  2.10(0.93)  -0.29  -0.67 to 0.08 | 2.17(0.75)  2.36(0.93)  -0.24  -0.62 to 0.13 | 2.27(0.61)  2.51(0.74)  -0.37  -0.74 to 0.01 |
| **Diabetes**  Present  Absent  Effect size  95% CI | 2.17(0.55)  2.35(0.58)  -0.32  -0.76 to 0.13 | 2.28(0.57)  2.33(0.55)  -0.08  -0.52 to 0.37 | 2.34(0.62)  2.38(0.62)  -0.06  0.51 to 0.38 | 3.66(0.39)  3.55(0.53)  0.21  -0.23 to 0.66 | 1.96(0.53)  2.06(0.59)  -0.16  -0.61 to 0.28 | 2.10(0.73)  2.24(0.80)  -0.18  -0.62 to 0.27 | 1.837(0.58)  1.92(0.80)  -0.12  -0.56 to 0.33 | 2.13(0.80)  2.21(0.79)  -0.11  -0.55 to 0.34 | 2.23(0.61)  2.33(0.65)  -0.16  -0.60 to 0.29 |
| **BMI**  Normal  Overweight  Effect size  95% CI | 2.33(0.57)  2.33(0.60)  -0.003  -0.300 to 0.294 | 2.32(0.55)  2.32(0.55)  0.004  -0.293 to 0.301 | 2.36(0.59)  2.39(0.66)  -0.05  -0.35 to 0.25 | 3.54(0.56)  3.62(0.43)  -0.15  -0.45 to 0.14 | 2.06(0.59)  2.02(0.57)  0.06  -0.23 to 0.36 | 2.26(0.79)  2.15(0.79)  0.14  -0.15 to 0.44 | 1.94(0.80)  1.87(0.73)  0.09  -0.21 to 0.39 | 2.23(0.80)  2.15(0.76)  0.10  -0.20 to 0.39 | 2.35(0.66)  2.24(0.61)  0.17  -0.12 to 0.47 |
| **Hypertension**  Normal  Hypertensive  Effect size  95% CI | **2.47(0.59)**  **2.18(0.53)**  **0.52**  **0.23 to 0.81** | **2.42(0.60)**  **2.21(0.48)**  **0.40**  **0.11 to 0.69** | **2.51(0.63)**  **2.22(0.56)**  **0.49**  **0.20 to 0.78** | **3.64(0.44)**  **3.48(0.58)**  **0.32**  **0.03 to 0.61** | **2.17(0.63)**  **1.91(0.48)**  **0.47**  **0.18 to 0.76** | **2.38(0.88)**  **2.05(0.64)**  **0.42**  **0.13 to 0.71** | **2.09(0.88)**  **1.71(0.59)**  **0.50**  **0.21 to 0.79** | **2.37(0.88)**  **2.02(0.62)**  **0.45**  **0.16 to 0.74** | **2.45(0.68)**  **2.16(0.56)**  **0.46**  **0.17 to 0.75** |

Note: BMI=Body Mass Index, CI= Confidence Interval, SD=Standard Deviation
