# Supplementary material for: Health Literacy and Its Association with Non-Communicable Disease Risk Factors Among Gurkha Veterans: Insights from Western Nepal
Source: Research Square preprint supplement (doi:10.21203/rs.3.rs-6809976/v1), 2025-08-20
Supplement: Supplementary file 2 [file 58b5719c3b9caed15803844d.docx]

**Health Literacy and Its Association with Non-Communicable Disease Risk Factors Among Gurkha Veterans: Insights from Western Nepal**

# Information about this questionnaire and how to fill it in

This questionnaire contains two parts.

In **Part 1** you are asked to indicate how strongly you **disagree** or **agree** with a set of statements.

In **Part 2** you are asked to indicate how **difficult** or **easy** you find a set of tasks. For each statement or task check the box that **best describes you now**

Please ensure that you **check a box** for **every** statement or task.

# Part 1 of the questionnaire starts here

Please indicate how strongly you **disagree** or **agree** with each of the following statements. Remember to check only **one** box for each statement.


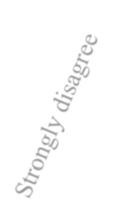

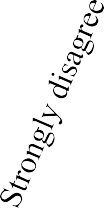

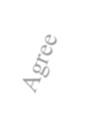

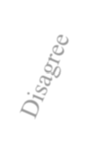

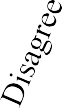

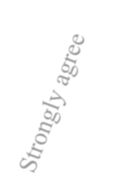

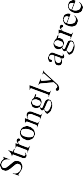


| 1 | I feel I have good information about health | □ □ □ □ |
| --- | --- | --- |
| 2 | I have at least one healthcare provider who knows me well | □ □ □ □ |
| 3 | I can get access to several people who understand and support me | □ □ □ □ |
| 4 | I compare health information from different sources | □ □ □ □ |
| 5 | When I feel ill, the people around me really understand what  I am going through | □ □ □ □ |
| 6 | I spend quite a lot of time actively managing my health | □ □ □ □ |
| 7 | When I see new information about health, I check up on whether it is true or not | □ □ □ □ |

**Part 1** continued


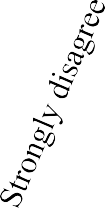

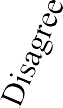

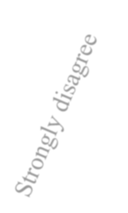

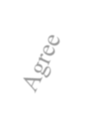

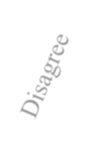

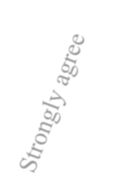


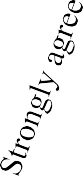
Please indicate how strongly you **disagree** or **agree** with each of the following statements. Remember to check only **one** box for each statement.

| 8 | I have at least one healthcare provider I can discuss my health problems with | □ □ □ □ |
| --- | --- | --- |
| 9 | I make plans for what I need to do to be healthy | □ □ □ □ |
| 10 | I have enough information to help me deal with my health problems | □ □ □ □ |
| 11 | If I need help, I have plenty of people I can rely on | □ □ □ □ |
| 12 | I always compare health information from different sources and decide what is best for me | □ □ □ □ |
| 13 | Despite other things in my life, I make time to be healthy | □ □ □ □ |
| 14 | I am sure I have all the information I need to manage my health effectively | □ □ □ □ |
| 15 | I have at least one person who can come to medical appointments with me | □ □ □ □ |
| 16 | I know how to find out if the health information I receive is right or not | □ □ □ □ |
| 17 | I have the healthcare providers I need to help me work out what I need to do | □ □ □ □ |
| 18 | I set my own goals about health and fitness | □ □ □ □ |
| 19 | I have strong support from family or friends | □ □ □ □ |
| 20 | I ask healthcare providers about the quality of the health information I find | □ □ □ □ |
| 21 | There are things that I do regularly to make myself more healthy | □ □ □ □ |
| 22 | I can rely on at least one healthcare provider | □ □ □ □ |
| 23 | I have all the information I need to look after my health | □ □ □ □ |

Please continue to the next page.

# Part 2 of the questionnaire starts here

Please indicate how **difficult** or **easy** the following tasks are for you **now.** Remember to check only **one** box for each statement.


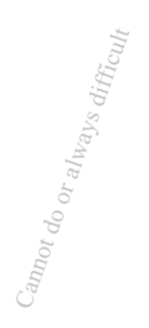

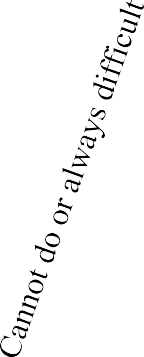

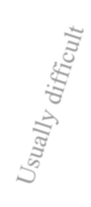

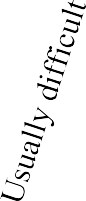

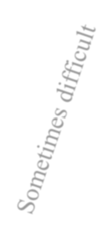

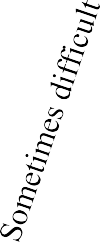

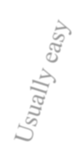

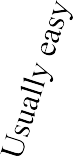

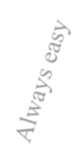

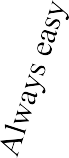


| 1 | Find the right health care | □ □ □ □ □ |
| --- | --- | --- |
| 2 | Make sure that healthcare providers understand your problems properly | □ □ □ □ □ |
| 3 | Find information about health problems | □ □ □ □ □ |
| 4 | Feel able to discuss your health concerns with a healthcare provider | □ □ □ □ □ |
| 5 | Confidently fill medical forms in the correct way | □ □ □ □ □ |
| 6 | Find health information from several different places | □ □ □ □ □ |
| 7 | Have good discussions about your health with doctors | □ □ □ □ □ |
| 8 | Get to see the healthcare providers you need to | □ □ □ □ □ |
| 9 | Accurately follow instructions from healthcare providers | □ □ □ □ □ |
| 10 | Get information about health so you are up to date with the best information | □ □ □ □ □ |
| 11 | Decide which healthcare provider you need to see | □ □ □ □ □ |
| 12 | Read and understand written health information | □ □ □ □ □ |
| 13 | Make sure you find the right place to get the health care you need | □ □ □ □ □ |

Please continue to the next page.

Please indicate how **difficult** or **easy** the following tasks are for you now. Remember to check only **one** box


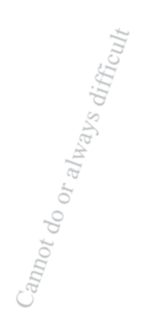

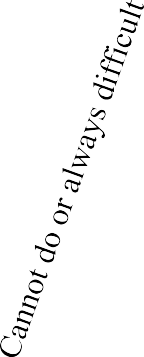

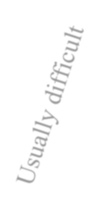

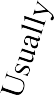

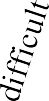

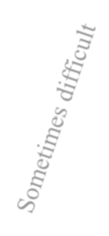

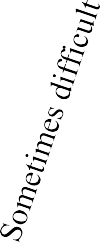

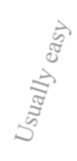

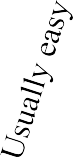

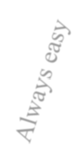

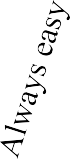


for each statement.

| 14 | Get health information in words you understand | □ □ □ □ □ |
| --- | --- | --- |
| 15 | Discuss things with healthcare providers until you understand all you need to | □ □ □ □ □ |
| 16 | Find out which healthcare services you are entitled to | □ □ □ □ □ |
| 17 | Read and understand all the information on medication labels | □ □ □ □ □ |
| 18 | Get health information by yourself | □ □ □ □ □ |
| 19 | Work out what the best care is for you | □ □ □ □ □ |
| 20 | Ask healthcare providers questions to get the health information you need | □ □ □ □ □ |
| 21 | Understand what healthcare providers are asking you to do | □ □ □ □ □ |

**Thank you for completing this questionnaire.**
