# Supplementary material for: Health Literacy and Its Association with Non-Communicable Disease Risk Factors Among Gurkha Veterans: Insights from Western Nepal
Source: Research Square preprint supplement (doi:10.21203/rs.3.rs-6809976/v1), 2025-08-20
Supplement: Supplementary file 3 [file 7cf968db717ddab21af28bac.docx]

***Table 1. Demographic and behavioral characteristics of* Nepali Gurkha veterans *(n=189)***

| **Socio-demographic characteristics** | | **n** | **%** |
| --- | --- | --- | --- |
| Regiments | 1st Gorkha Rifles | 47 | 24.9 |
| 3rd Gorkha Rifles | 11 | 5.8 |
| 4th Gorkha Rifles | 32 | 16.9 |
| 5th Gorkha Rifles | 27 | 14.3 |
| 8th Gorkha Rifles | 56 | 29.6 |
| Others | 16 | 8.5 |
| War involvement | Yes | 135 | 71.4 |
|  | No | 54 | 28.6 |
| Position | Less than officer | 142 | 75.1 |
|  | Officer and above | 47 | 24.9 |
| Age | Middle-aged adults | 70 | 37.0 |
| Older adults | 119 | 3.0 |
| Educational Level | Below primary | 69 | 36.5 |
| Primary | 71 | 37.6 |
| Secondary | 49 | 25.9 |
| Service years | Less than 20 years | 108 | 57.1 |
| 20 years and more | 81 | 42.8 |
| **NCDs risk factors** | |  |  |
| Current smokers | Yes | 24 | 12.7 |
| No | 165 | 87.3 |
| Ever drank alcohol within a year | Yes | 156 | 82.5 |
| No | 33 | 17.5 |
| Blood pressure measurement | Normotensive | 99 | 52.4 |
| Hypertensive | 90 | 47.6 |
| Body Mass Index | Normal | 121 | 64.0 |
| Overweight and obese | 68 | 36.0 |
