# Supplementary material for: Health Literacy and Its Association with Non-Communicable Disease Risk Factors Among Gurkha Veterans: Insights from Western Nepal
Source: Research Square preprint supplement (doi:10.21203/rs.3.rs-6809976/v1), 2025-08-20
Supplement: Supplementary file 4 [file d1a70c718f2d6043a8529c23.docx]

***Table 2: Health Literacy Questionnaire (HLQ) scores of* Nepali Gurkha veteran*s (n=189)***

| **Scale** | **Mean** | **SD** | **95% of CI** |
| --- | --- | --- | --- |
| 1. Feeling understood and supported by healthcare professional | 2.33 | 0.58 | 2.24 to 2.416 |
| 2. Having sufficient information to manage my health | 2.32 | 0.55 | 2.24 to 2.4 |
| 3. Actively managing my health | 2.37 | 0.62 | 2.28 to 2.45 |
| 4.Social support for health | 3.56 | 0.51 | 3.49 to 3.64 |
| 5. Appraisal of health information | 2.04 | 0.57 | 1.96 to 2.12 |
| 6. Ability to actively engage with healthcare providers | 2.22 | 0.78 | 2.11 to 2.33 |
| 7. Navigating the healthcare system | 1.91 | 0.77 | 1.8 to 2.02 |
| 8. Ability to find good health information | 2.2 | 0.78 | 2.08 to 2.31 |
| 9. Understanding health information well enough to know what to do | 2.31 | 0.64 | 2.22 to 2.24 |
| For scales 1–5, scores ranged from 1 to 4. For scales 6–9, scores ranged from 1 to 5. | | | |
